# Supplementary material for: Nocturnal Atmospheric Synergistic Oxidation Reduces the Formation of Low-volatility Organic Compounds from Biogenic Emissions
Source: Copernicus journal article supplement (doi:10.5194/egusphere-2024-1131), 2024-04-17
Supplement: Supplementary file 1 [file egusphere-2024-1131-supplement.pdf]

*Supplement of*

**Nocturnal Atmospheric Synergistic Oxidation Reduces the Formation of Low-volatility Organic Compounds from Biogenic Emissions**

Han Zang<sup>1</sup>, Zekun Luo<sup>1</sup>, Chenxi Li<sup>1</sup>, Ziyue Li<sup>1</sup>, Dandan Huang<sup>2,\*</sup>, Yue Zhao<sup>1,\*</sup>

<sup>1</sup>School of Environmental Science and Engineering, Shanghai Jiao Tong University, Shanghai, 200240, China

<sup>2</sup>Shanghai Academy of Environmental Sciences, Shanghai, 200233, China

\*Correspondence: Yue Zhao (yuezhao20@sjtu.edu.cn); Dandan Huang (huangdd@saes.sh.cn);

*This file contains*

*7 pages*

*3 tables*

*1 scheme*

*6 figures*

Table S1. Summary of experimental conditions.

| Exp #           | $\alpha$ -pinene Conc | O <sub>3</sub> Conc | NO <sub>3</sub> Conc<br>(simulated) | N <sub>2</sub> O <sub>5</sub> Conc<br>(simulated) | Reacted<br>$\alpha$ -pinene |
|-----------------|-----------------------|---------------------|-------------------------------------|---------------------------------------------------|-----------------------------|
| 1               | 100                   | 394                 | -                                   | -                                                 | 4.20                        |
| 2               | 200                   | 394                 | -                                   | -                                                 | 8.37                        |
| 3               | 300                   | 394                 | -                                   | -                                                 | 12.51                       |
| 4               | 400                   | 394                 | -                                   | -                                                 | 16.63                       |
| 5               | 500                   | 394                 | -                                   | -                                                 | 20.72                       |
| 6               | 100                   | 394                 | 2.74                                | 11.51                                             | 14.11                       |
| 7               | 200                   | 394                 | 2.74                                | 11.51                                             | 18.41                       |
| 8               | 300                   | 394                 | 2.74                                | 11.51                                             | 22.59                       |
| 9               | 400                   | 394                 | 2.74                                | 11.51                                             | 26.73                       |
| 10              | 500                   | 394                 | 2.74                                | 11.51                                             | 30.84                       |
| 11*             | 100                   | 397                 | -                                   | -                                                 | 2.26                        |
| 12*             | 100                   | 397                 | 2.74                                | 11.51                                             | 12.39                       |
| 13 <sup>#</sup> | 300                   | 270                 | -                                   | -                                                 | 54.22                       |
| 14 <sup>#</sup> | 300                   | 270                 | 2.00                                | 12.00                                             | 65.88                       |

Note: All species concentrations are in ppb.

\*100 ppm cyclohexane was added as an OH scavenger in these experiments.

<sup>#</sup>SOA formation experiments. The total air flow in the reactor was 5 L min<sup>-1</sup> and the residence time was 180 seconds.

Table S2. Observed molecular formula, molar mass, and saturation vapor concentration of HOM-ONs in the O<sub>3</sub> + NO<sub>3</sub> regime.

| Molecular formula | Molar mass (g mol <sup>-1</sup> ) | Saturation vapor conc., C* (μg m <sup>-3</sup> ) | Molecular formula | Molar mass (g mol <sup>-1</sup> ) | Saturation vapor conc., C* (μg m <sup>-3</sup> ) |
|-------------------|-----------------------------------|--------------------------------------------------|-------------------|-----------------------------------|--------------------------------------------------|
| C7H9NO8           | 235.0328                          | 2.114784                                         | C18H21NO6         | 347.1368                          | 0.563055                                         |
| C7H13NO11         | 287.0488                          | -1.75213                                         | C18H23NO6         | 349.1525                          | 0.563055                                         |
| C8H11NO5          | 201.0637                          | 5.000419                                         | C18H21NO7         | 363.1318                          | -0.09533                                         |
| C8H15NO10         | 285.0696                          | -0.44685                                         | C18H23NO7         | 365.1474                          | -0.09533                                         |
| C8H13NO11         | 299.0488                          | -1.73627                                         | C18H27NO7         | 369.1787                          | -0.09533                                         |
| C8H13NO12         | 315.0437                          | -3.06641                                         | C18H33NO8         | 391.2206                          | -0.83685                                         |
| C8H15NO12         | 317.0594                          | -3.06641                                         | C18H35NO8         | 393.2362                          | -0.83685                                         |
| C9H11NO8          | 261.0484                          | 1.793846                                         | C18H21NO9         | 395.1216                          | -1.65153                                         |
| C9H11NO9          | 277.0433                          | 0.663671                                         | C18H29NO9         | 403.1842                          | -1.65153                                         |
| C9H17NO9          | 283.0903                          | 0.663671                                         | C18H21NO10        | 411.1165                          | -2.53093                                         |
| C9H17NO11         | 315.0801                          | -1.77195                                         | C18H23NO10        | 413.1322                          | -2.53093                                         |
| C9H15NO13         | 345.0543                          | -4.38285                                         | C18H31NO10        | 421.1948                          | -2.53093                                         |
| C10H15NO5         | 229.095                           | 4.300331                                         | C18H23NO11        | 429.1271                          | -3.46785                                         |
| C10H15NO6         | 245.0899                          | 3.500375                                         | C18H29NO11        | 435.174                           | -3.46785                                         |
| C10H15NO7         | 261.0848                          | 2.586279                                         | C18H21NO12        | 443.1063                          | -4.45614                                         |
| C10H13NO8         | 275.0641                          | 1.579446                                         | C18H23NO12        | 445.122                           | -4.45614                                         |
| C10H15NO8         | 277.0798                          | 1.579446                                         | C18H29NO12        | 451.169                           | -4.45614                                         |
| C10H17NO8         | 279.0954                          | 1.579446                                         | C18H21NO13        | 459.1013                          | -5.49047                                         |
| C10H13NO9         | 291.059                           | 0.49624                                          | C18H29NO13        | 467.1639                          | -5.49047                                         |
| C10H15NO9         | 293.0747                          | 0.49624                                          | C18H21NO14        | 475.0962                          | -6.56625                                         |
| C10H19NO9         | 297.106                           | 0.49624                                          | C19H31NO5         | 353.2202                          | 0.708682                                         |
| C10H13NO10        | 307.0539                          | -0.65061                                         | C19H23NO7         | 377.1474                          | -0.47287                                         |
| C10H15NO10        | 309.0696                          | -0.65061                                         | C19H23NO9         | 409.1372                          | -1.98218                                         |
| C10H17NO10        | 311.0852                          | -0.65061                                         | C19H29NO9         | 415.1842                          | -1.98218                                         |
| C10H19NO10        | 313.1009                          | -0.65061                                         | C19H31NO10        | 433.1948                          | -2.83699                                         |
| C10H13NO11        | 323.0488                          | -1.85105                                         | C19H25NO11        | 443.1427                          | -3.74903                                         |
| C10H15NO11        | 325.0645                          | -1.85105                                         | C19H33NO11        | 451.2053                          | -3.74903                                         |
| C10H17NO11        | 327.0801                          | -1.85105                                         | C19H23NO12        | 457.122                           | -4.71237                                         |
| C10H15NO12        | 341.0594                          | -3.09705                                         | C19H31NO12        | 465.1846                          | -4.71237                                         |
| C10H19NO12        | 345.0907                          | -3.09705                                         | C19H33NO12        | 467.2003                          | -4.71237                                         |
| C10H15NO13        | 357.0543                          | -4.3821                                          | C19H31NO13        | 481.1795                          | -5.72189                                         |
| C14H21NO8         | 331.1267                          | 0.488146                                         | C19H35NO13        | 485.2108                          | -5.72189                                         |
| C14H19NO9         | 345.106                           | -0.44079                                         | C19H37NO13        | 487.2264                          | -5.72189                                         |
| C14H19NO10        | 361.1009                          | -1.43582                                         | C19H33NO14        | 499.1901                          | -6.77312                                         |
| C14H19NO11        | 377.0958                          | -2.48832                                         | C19H33NO15        | 515.185                           | -7.86214                                         |
| C14H23NO12        | 397.122                           | -3.59112                                         | C20H25NO6         | 375.1682                          | -0.23872                                         |
| C14H19NO13        | 409.0856                          | -4.73817                                         | C20H23NO7         | 389.1474                          | -0.85605                                         |
| C14H19NO14        | 425.0805                          | -5.92438                                         | C20H25NO7         | 391.1631                          | -0.85605                                         |
| C14H21NO14        | 427.0962                          | -5.92438                                         | C20H25NO8         | 407.158                           | -1.55328                                         |

|            |          |          |            |          |          |
|------------|----------|----------|------------|----------|----------|
| C15H17NO7  | 323.1005 | 0.994946 | C20H27NO8  | 409.1737 | -1.55328 |
| C15H23NO11 | 393.1271 | -2.7078  | C20H31NO8  | 413.2049 | -1.55328 |
| C15H25NO13 | 427.1325 | -4.89625 | C20H33NO8  | 415.2206 | -1.55328 |
| C15H23NO14 | 441.1118 | -6.05289 | C20H27NO9  | 425.1686 | -2.32154 |
| C15H23NO16 | 473.1016 | -8.46949 | C20H29NO9  | 427.1842 | -2.32154 |
| C16H19NO7  | 337.1161 | 0.639584 | C20H31NO9  | 429.1999 | -2.32154 |
| C16H21NO7  | 339.1318 | 0.639584 | C20H27NO10 | 441.1635 | -3.1532  |
| C16H19NO8  | 353.111  | -0.15311 | C20H29NO10 | 443.1791 | -3.1532  |
| C16H27NO8  | 361.1737 | -0.15311 | C20H31NO10 | 445.1948 | -3.1532  |
| C16H19NO9  | 369.106  | -1.02087 | C20H33NO10 | 447.2104 | -3.1532  |
| C16H23NO9  | 373.1372 | -1.02087 | C20H31NO11 | 461.1897 | -4.04171 |
| C16H27NO10 | 393.1635 | -1.95432 | C20H33NO11 | 463.2053 | -4.04171 |
| C16H27NO15 | 473.1381 | -7.36903 | C20H35NO11 | 465.221  | -4.04171 |
| C17H21NO6  | 335.1368 | 0.957198 | C20H29NO12 | 475.169  | -4.98139 |
| C17H21NO7  | 351.1318 | 0.275791 | C20H31NO12 | 477.1846 | -4.98139 |
| C17H21NO8  | 367.1267 | -0.49036 | C20H33NO12 | 479.2003 | -4.98139 |
| C17H27NO8  | 373.1737 | -0.49036 | C20H31NO13 | 493.1795 | -5.96728 |
| C17H21NO9  | 383.1216 | -1.33067 | C20H33NO13 | 495.1951 | -5.96728 |
| C17H21NO10 | 399.1165 | -2.23623 | C20H31NO14 | 509.1744 | -6.99505 |
| C17H25NO10 | 403.1478 | -2.23623 | C20H33NO14 | 511.1901 | -6.99505 |
| C17H27NO11 | 421.1584 | -3.19952 | C20H39NO14 | 517.237  | -6.99505 |
| C17H31NO14 | 473.1744 | -6.37603 | C20H31NO15 | 525.1693 | -8.0609  |

Table S3. Molecular formula and molar mass of highly oxygenated  $\text{NO}_3\text{RO}_2$  and  $\text{C}_x\text{H}_y\text{O}_z$ -HOM monomers which have very close molar masses.

| $\text{NO}_3\text{RO}_2$ | molar mass ( $\text{g mol}^{-1}$ ) | CHO-HOM   | molar mass ( $\text{g mol}^{-1}$ ) |
|--------------------------|------------------------------------|-----------|------------------------------------|
| C10H16NO6                | 246.10                             | C10H14O7  | 246.07                             |
| C10H16NO7                | 262.09                             | C10H14O8  | 262.07                             |
| C10H16NO8                | 278.09                             | C10H14O9  | 278.06                             |
| C10H16NO9                | 294.08                             | C10H14O10 | 294.06                             |
| C10H16NO10               | 310.08                             | C10H14O11 | 310.05                             |

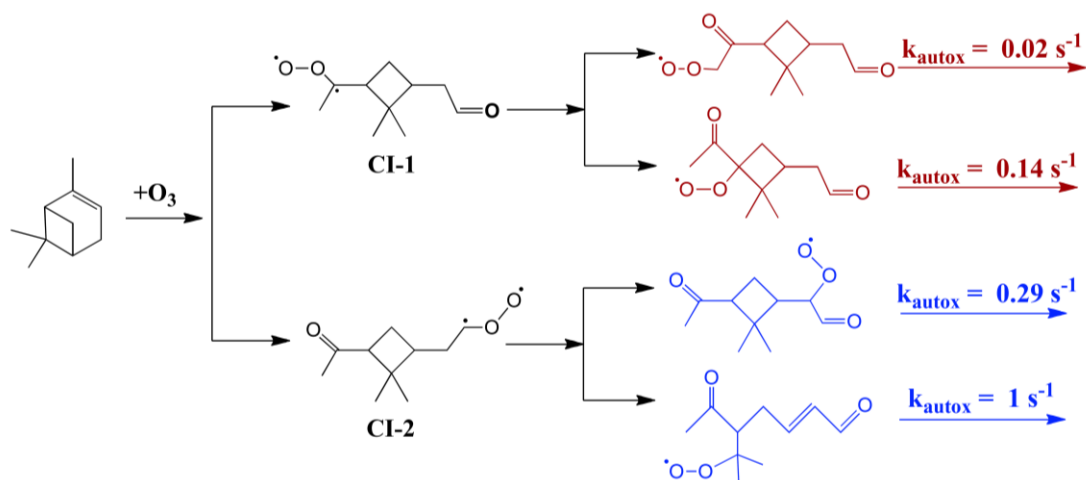

Scheme S1. Simplified pathways leading to the formation of four different primary  $\text{C}_1\text{RO}_2$  radicals.

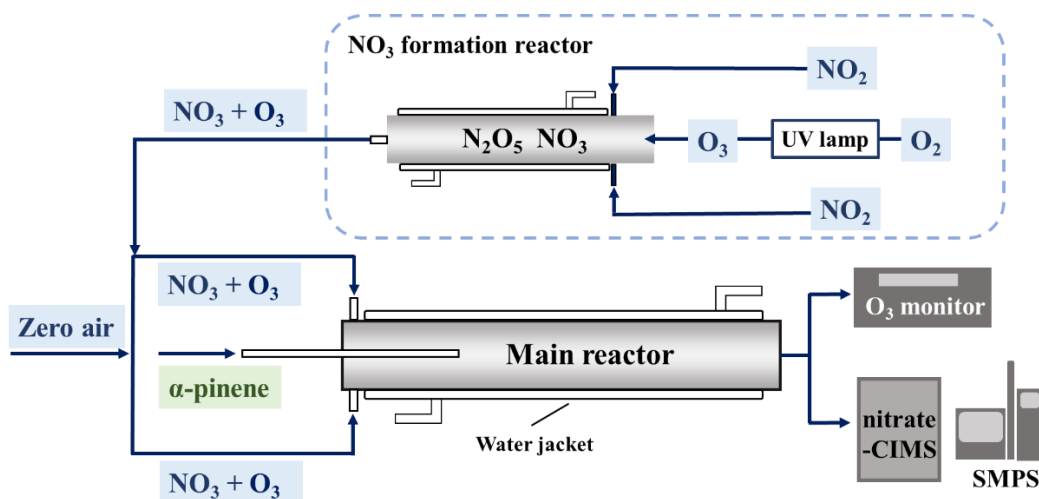

Figure S1. Schematic diagram of the flow tube system used for synergistic oxidation experiments.

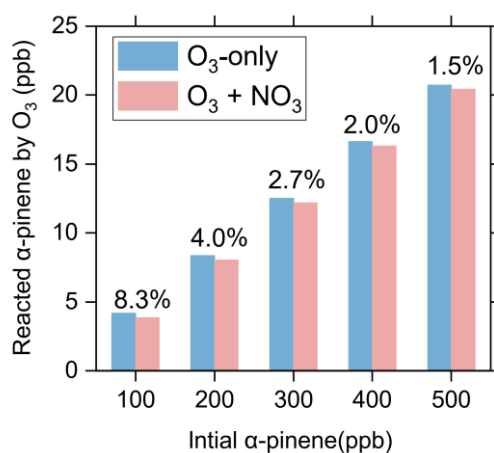

Figure S2. Simulated reacted  $\alpha$ -pinene by  $\text{O}_3$  as a function of initial  $\alpha$ -pinene concentrations in  $\text{O}_3$ -only and  $\text{O}_3 + \text{NO}_3$  regimes (Exps 1-10).

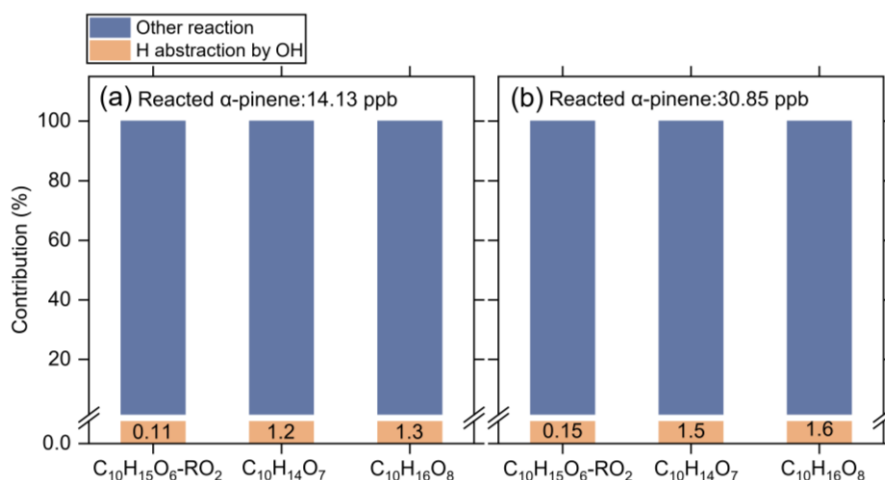

Figure S3. Simulated contributions of the H-abstraction pathways by OH radicals (yellow) and OH-addition and ozonolysis pathways (blue) to the formation of typical HOMs under different reacted  $\alpha$ -pinene conditions. The cross-reaction rate constant was set to  $1 \times 10^{-13} \text{ cm}^3 \text{ molecule}^{-1} \text{ s}^{-1}$  for the primary  $C_{10}H_{15}O_2-RO_2$  and  $1 \times 10^{-12} \text{ cm}^3 \text{ molecule}^{-1} \text{ s}^{-1}$  for the more oxygenated  $RO_2$ . The reaction rate of  $RO_2 + NO_3$  is the same as default value in MCM v3.3.1.

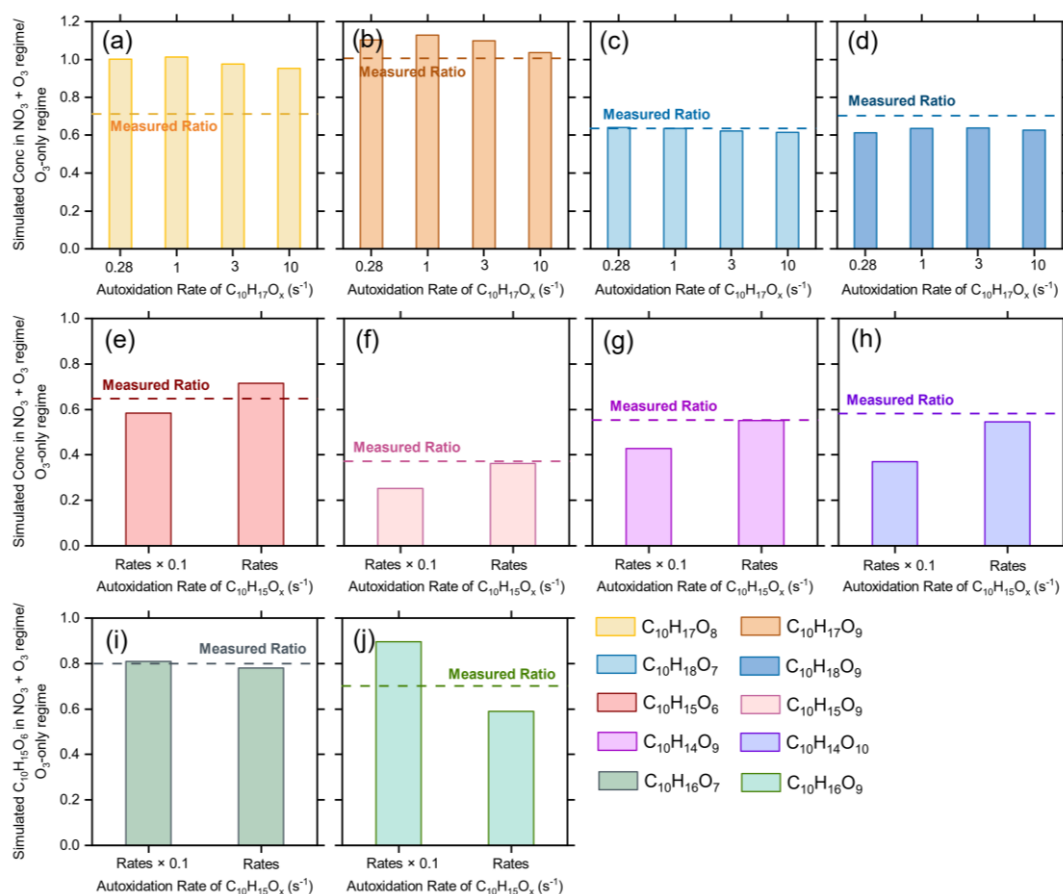

Figure S4 Sensitivity analysis of the autoxidation rate of  $^{OH}RO_2$  and  $^{Cl}RO_2$ . The cross-reaction rates of  $^{NO_3}RO_2 + ^{Cl}RO_2$  and  $^{NO_3}RO_2 + ^{OH}RO_2$  were set to  $1 \times 10^{-12} \text{ cm}^3 \text{ molecule}^{-1} \text{ s}^{-1}$  and  $1 \times 10^{-13} \text{ cm}^3 \text{ molecule}^{-1} \text{ s}^{-1}$ , respectively. The autoxidation rate of  $^{OH}RO_2$  varies from 0.28 – 10  $\text{s}^{-1}$ , and the autoxidation rates of the four different  $^{Cl}RO_2$  are lowered by a factor of 10.

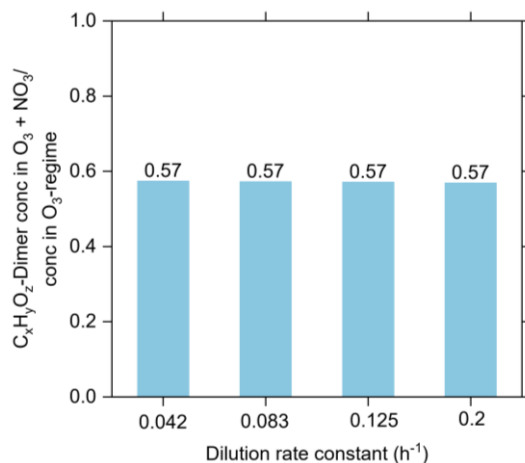

Figure S5 Influence of the dilution rate constant on the reduction of  $C_xH_yO_z$ -HOM dimers in the  $O_3 + NO_3$  synergistic regime.

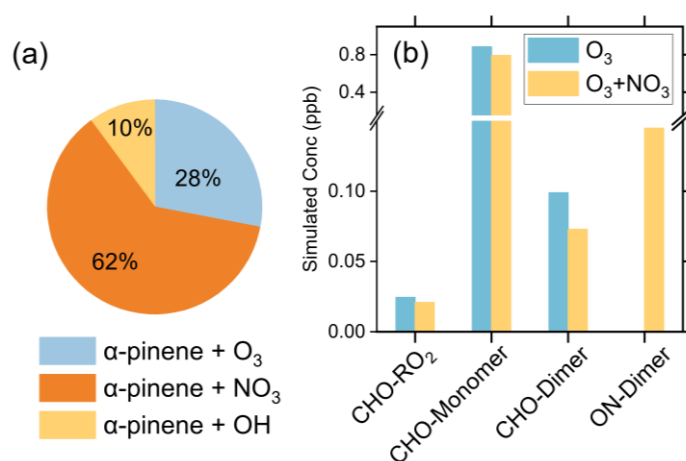

Figure S6 Simulated (a) contributions of different loss pathways of  $\alpha$ -pinene by different oxidants and (b) concentration of  $C_xH_yO_z$ -HOMs and ONs in the absence and presence of  $NO_3$  radicals under typical nighttime ambient conditions with an OH concentration of  $5 \times 10^5$  molecules  $cm^{-3}$  (Stone et al., 2012; Geyer et al., 2003).

### References:

- Geyer, A., Bächmann, K., Hofzumahaus, A., Holland, F., Konrad, S., Klüpfel, T., Pätz, H. W., Perner, D., Mihelcic, D., Schäfer, H. J., Volz-Thomas, A., and Platt, U.: Nighttime formation of peroxy and hydroxyl radicals during the BERLIOZ campaign: Observations and modeling studies, *J. Geophys. Res.-Atmos.*, 108, 10.1029/2001jd000656, 2003.
- Stone, D., Whalley, L. K., and Heard, D. E.: Tropospheric OH and  $HO_2$  radicals: field measurements and model comparisons, *Chem. Soc. Rev.*, 41, 10.1039/c2cs35140d, 2012.
